# Supplementary material for: Comparison of Efficacy and Safety of Atezolizumab Plus Bevacizumab and Lenvatinib as First-Line Therapy for Unresectable Hepatocellular Carcinoma: A Propensity Score Matching Analysis
Source: PubMed Central journal article supplement — Target Oncol. 2022 Oct 22;17(6):643–53. doi: 10.1007/s11523-022-00921-x (PMC9684293; doi:10.1007/s11523-022-00921-x), 2022-10-22
Supplement: 11523_2022_921_MOESM1_ESM.pdf [file 11523_2022_921_MOESM1_ESM.pdf]

**Comparison of efficacy and safety of atezolizumab plus bevacizumab and lenvatinib as first-line therapy for unresectable hepatocellular carcinoma: A propensity score matching analysis**

Takashi Niizeki<sup>1</sup>, Takayuki Tokunaga<sup>2</sup>, Yuko Takami<sup>3</sup>, Yoshiyuki Wada<sup>3</sup>, Masaru Harada<sup>4</sup>, Michihiko Shibata<sup>4</sup>, Kazuhiko Nakao<sup>5</sup>, Ryu Sasaki<sup>5</sup>, Fumihito Hirai<sup>6</sup>, Satoshi Shakado<sup>6</sup>, Tomoharu Yoshizumi<sup>7</sup>, Shinji Itoh<sup>7</sup>, Hiroshi Yatsushashi<sup>8</sup>, Shigemune Bekki<sup>8</sup>, Akio Ido<sup>9</sup>, Seiichi Mawatari<sup>9</sup>, Koichi Honda<sup>10</sup>, Rie Sugimoto<sup>11</sup>, Takeshi Senju<sup>11</sup>, Hirokazu Takahashi<sup>12</sup>, Takuya Kuwashiro<sup>13</sup>, Tatsuji Maeshiro<sup>14</sup>, Makoto Nakamuta<sup>15</sup>, Yoshifusa Aratake<sup>15</sup>, Tsutomu Yamashita<sup>16</sup>, Yuichiro Otsuka<sup>16</sup>, Shuichi Matsumoto<sup>17</sup>, Tetsuro Sohda<sup>18</sup>, Shigeo Shimose<sup>1\*</sup>, Kenta Murotani<sup>19</sup>, Yasuhito Tanaka<sup>2</sup>: Kyushu Liver Cancer Study Group of Japan

1. Division of Gastroenterology, Department of Medicine, Kurume University School of Medicine, Kurume, Fukuoka 830-0011, Japan

2. Department of Gastroenterology and Hepatology, Faculty of Life Sciences, Kumamoto University, Kumamoto, Japan

3. Department of Hepato-Biliary-Pancreatic Surgery, National Hospital Organization Kyushu Medical Center, Fukuoka, Japan

4. Third Department of Internal Medicine, School of Medicine, University of Occupational and Environmental Health, Kitakyushu, Japan.

5. Department of Gastroenterology and Hepatology, Nagasaki University Hospital, Nagasaki, Japan.

6. Department of Gastroenterology and Medicine, Faculty of Medicine, Fukuoka University, Fukuoka, Japan
7. Department of Surgery and Science, Graduate School of Medical Sciences, Kyushu University, Fukuoka, Japan.
8. Clinical Research Center, National Hospital Organization Nagasaki Medical Center, Department of Hepatology, Nagasaki University Graduate School of Biomedical Sciences, 2-1001-1 Kubara, Omura, Nagasaki, 856-8562, Japan.
9. Department of Human and Environmental Sciences, Digestive and Lifestyle Diseases, Kagoshima University Graduate School of Medical and Dental Sciences, Kagoshima, Japan.
10. Department of Gastroenterology, Faculty of Medicine, Oita University, Yufu, Japan
11. Department of Hepato-Biliary-Pancreatology, National Hospital Organization Kyushu Cancer Center, Fukuoka, Japan
12. Division of Metabolism and Endocrinology, Faculty of Medicine, Saga University
13. Liver Center, Saga University Hospital, Faculty of Medicine, Saga University
14. First Department of Internal Medicine, University of the Ryukyus Hospital, Okinawa, Japan
15. Department of Gastroenterology and Hepatology, National Hospital Organization Kyushu Medical Center, Fukuoka, Japan
16. Department of Gastroenterology, National Hospital Organization Oita Medical Center
17. Department of Gastroenterology, Fukuoka Tokushukai Hospital, Kasuga,

Japan.

18. Department of Hepatology, Japanese Red Cross Fukuoka Hospital,  
Fukuoka, Japan.

19. Biostatistics Center, Graduate School of Medicine, Kurume University

Supplementary Table 1. Response rate according to modified-RECIST before PSM

| Response category | Atezo/Beva<br>(n=161) | LEN<br>(n=568) | p     |
|-------------------|-----------------------|----------------|-------|
| CR                | 17 (10.6%)            | 40 (7.0%)      |       |
| PR                | 54 (33.6%)            | 230 (40.5%)    |       |
| SD                | 72 (44.7%)            | 189 (33.2%)    |       |
| PD                | 18 (11.1%)            | 109 (19.3%)    |       |
| ORR               | 67 (44.2%)            | 270 (47.5%)    | 0.440 |
| DCR               | 143 (88.9%)           | 459 (80.7%)    | 0.013 |

Abbreviations: Atezo/beva; atezolizumab plus Bevacizumab, LEN; Lenvatinib, CR, complete response; PR, partial response; SD, stable disease; PD, progressive disease; ORR, objective response rate; DCR, disease control rate

Supplementary Table 2. Response rate according to modified-RECIST after PSM

| Response category | Atezo/Beva<br>(n=152) | LEN<br>(n=152) | p     |
|-------------------|-----------------------|----------------|-------|
| CR                | 17 (11.2%)            | 13 (8.5%)      |       |
| PR                | 50 (32.9%)            | 58 (38.2%)     |       |
| SD                | 70 (46.1%)            | 49 (32.2%)     |       |
| PD                | 15 (9.8%)             | 32 (21.1%)     |       |
| ORR               | 67 (44.8%)            | 71 (46.7%)     | 0.644 |
| DCR               | 137 (90.2%)           | 120 (78.9%)    | 0.006 |

Abbreviations: Atezo/beva; atezolizumab plus Bevacizumab, LEN; Lenvatinib, CR, complete response; PR, partial response; SD, stable disease; PD, progressive disease; ORR, objective response rate; DCR, disease control rate

Supplementary Figure 1.

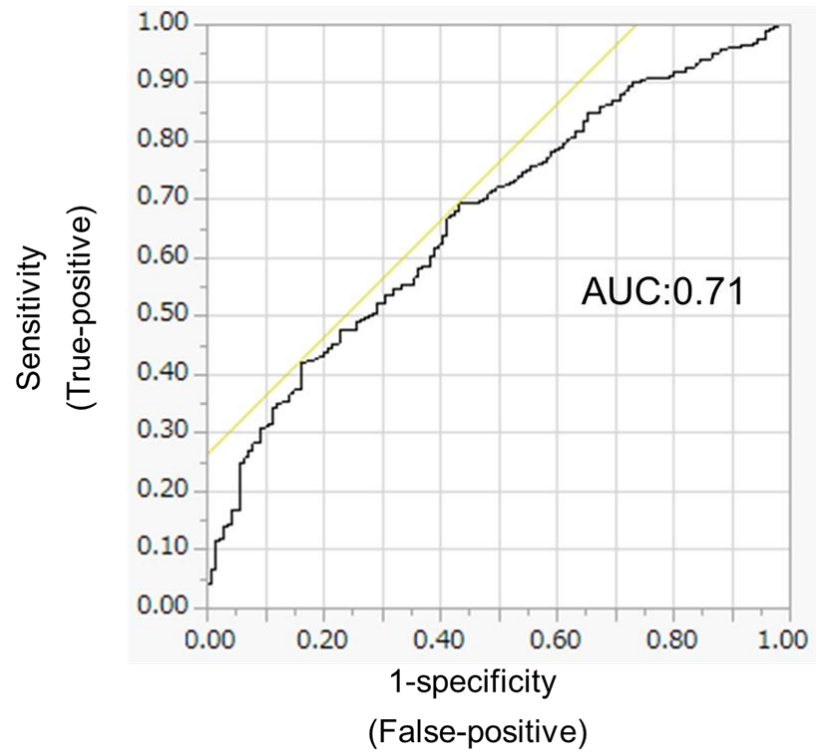

**Figure legends**

Supplementary Figure 1. C-statics by using ROC analysis.
